# Supplementary material for: A novel urinary oxalate determination method via a catalase model compound with oxalate oxidase
Source: Royal Society of Chemistry journal article supplement (doi:10.1039/b9ay00247b), 2009-12-17
Supplement: b9ay00247b.pdf [file b9ay00247b.pdf]

Supplementary figure S1

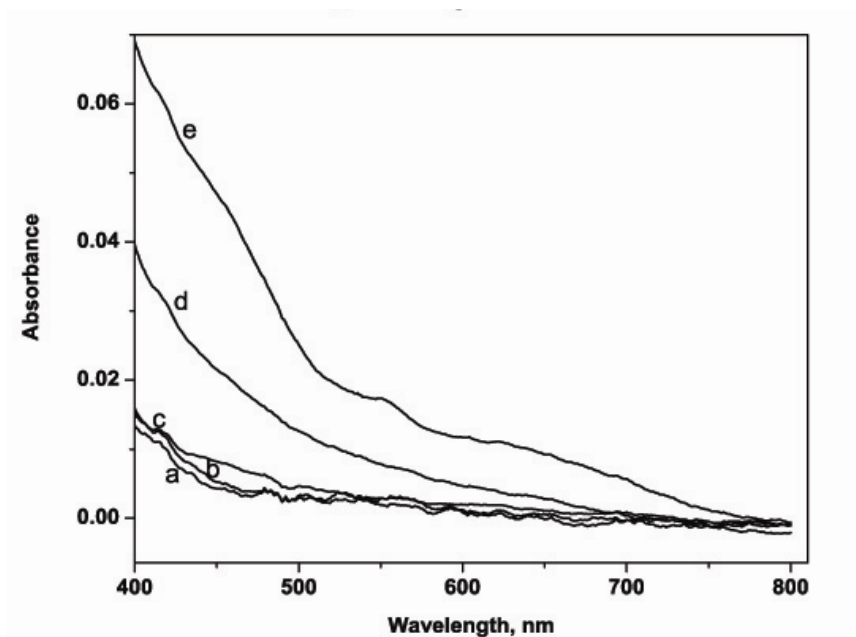

The UV-vis spectra of a) oxalate oxidase (10  $\mu\text{g}$ ), b) model compounds (1 mM), c) oxalate oxidase and the pretreated urine sample, d) the sum of b and c, e) incubation of the mixture d at 50°C for 10 min. All the samples were measured at room temperature in pH 6, 50 mM succinate buffer.
